# Supplementary material for: Rationalizing polymorphism with local correlation-based methods: a case study of pnictogen molecular crystals
Source: Royal Society of Chemistry journal article supplement (doi:10.1039/d4cp03697b), 2024-01-01
Supplement: d4cp03697b1.pdf [file d4cp03697b1.pdf]

SI.xlsx

This file cannot be rendered in this PDF. Please download the source file.
